# Supplementary material
Source: PubMed Central journal article supplement (PMC6416084)
Supplement: NIHMS1011479-supplement-supp.pdf [file NIHMS1011479-supplement-supp.pdf]

**Web Appendix for "Estimating Causal Log-Odds Ratio Using Case-Control  
Sample and Its Application in Pharmaco-Epidemiology Studies"**

Anqi Zhu, Donglin Zeng, Pengyue Zhang and Lang Li

These tables provide estimated drug effects on adverse event in the decreasing order of OR. Most of the drugs have a significant effect on increasing the risk of adverse event.

[Table 1 about here.]

[Table 2 about here.]

[Table 3 about here.]

**Table 1**  
Analysis result for the real data

| Drugbank ID | Drug Name            | Estimates of log OR | Standard Error | Z value | P value | OR    |
|-------------|----------------------|---------------------|----------------|---------|---------|-------|
| DB00295     | Morphine             | 3.46                | 0.02           | 208.50  | <0.001  | 31.74 |
| DB00697     | Tizanidine           | 3.36                | 0.02           | 143.14  | <0.001  | 28.70 |
| DB00813     | Fentanyl             | 3.19                | 0.02           | 178.67  | <0.001  | 24.23 |
| DB00904     | Ondansetron          | 3.14                | 0.02           | 207.01  | <0.001  | 23.04 |
| DB01075     | Diphenhydramine      | 3.07                | 0.02           | 133.87  | <0.001  | 21.59 |
| DB00281     | Lidocaine            | 2.90                | 0.02           | 131.23  | <0.001  | 18.25 |
| DB01069     | Promethazine         | 2.90                | 0.01           | 216.79  | <0.001  | 18.16 |
| DB06724     | Calcium carbonate    | 2.81                | 0.02           | 171.99  | <0.001  | 16.68 |
| DB00956     | Hydrocodone          | 2.67                | 0.01           | 452.33  | <0.001  | 14.42 |
| DB00321     | Amitriptyline        | 2.59                | 0.02           | 163.73  | <0.001  | 13.32 |
| DB00874     | Guaifenesin          | 2.59                | 0.02           | 146.44  | <0.001  | 13.27 |
| DB01137     | Levofloxacin         | 2.55                | 0.02           | 135.37  | <0.001  | 12.86 |
| DB01234     | Dexamethasone        | 2.55                | 0.02           | 119.28  | <0.001  | 12.76 |
| DB00273     | Topiramate           | 2.52                | 0.02           | 125.46  | <0.001  | 12.40 |
| DB00514     | Dextromethorphan     | 2.45                | 0.03           | 97.78   | <0.001  | 11.54 |
| DB00945     | Acetylsalicylic acid | 2.41                | 0.01           | 176.40  | <0.001  | 11.13 |
| DB00656     | Trazodone            | 2.31                | 0.01           | 177.10  | <0.001  | 10.03 |
| DB01611     | Hydroxychloroquine   | 2.30                | 0.03           | 77.35   | <0.001  | 9.93  |
| DB00334     | Olanzapine           | 2.27                | 0.03           | 85.36   | <0.001  | 9.72  |
| DB00852     | Pseudoephedrine      | 2.27                | 0.02           | 91.37   | <0.001  | 9.71  |
| DB00490     | Bupirone             | 2.26                | 0.02           | 91.11   | <0.001  | 9.59  |
| DB00318     | Codeine              | 2.26                | 0.02           | 141.40  | <0.001  | 9.58  |
| DB00388     | Phenylephrine        | 2.24                | 0.03           | 81.11   | <0.001  | 9.42  |
| DB00153     | Ergocalciferol       | 2.21                | 0.02           | 104.43  | <0.001  | 9.15  |
| DB00370     | Mirtazapine          | 2.20                | 0.02           | 102.87  | <0.001  | 9.05  |
| DB01015     | Sulfamethoxazole     | 2.13                | 0.02           | 138.31  | <0.001  | 8.38  |
| DB00443     | Betamethasone        | 2.09                | 0.03           | 82.04   | <0.001  | 8.08  |
| DB00440     | Trimethoprim         | 2.07                | 0.01           | 140.38  | <0.001  | 7.95  |
| DB00268     | Ropinirole           | 2.06                | 0.03           | 79.51   | <0.001  | 7.85  |
| DB00257     | Clotrimazole         | 2.04                | 0.03           | 76.38   | <0.001  | 7.67  |
| DB00196     | Fluconazole          | 2.01                | 0.02           | 109.69  | <0.001  | 7.48  |
| DB00537     | Ciprofloxacin        | 1.95                | 0.02           | 120.16  | <0.001  | 7.06  |
| DB01114     | Chlorphenamine       | 1.95                | 0.02           | 78.21   | <0.001  | 7.04  |
| DB00924     | Cyclobenzaprine      | 1.89                | 0.01           | 163.71  | <0.001  | 6.64  |
| DB00285     | Venlafaxine          | 1.87                | 0.02           | 112.18  | <0.001  | 6.49  |

**Table 2**  
Analysis result for the real data Cont'd

| Drugbank ID | Drug Name     | Estimates of log OR | Standard Error | Z value | P value | OR   |
|-------------|---------------|---------------------|----------------|---------|---------|------|
| DB01062     | Oxybutynin    | 1.84                | 0.02           | 81.85   | <0.001  | 6.33 |
| DB00338     | Omeprazole    | 1.84                | 0.01           | 191.81  | <0.001  | 6.27 |
| DB01222     | Budesonide    | 1.83                | 0.02           | 74.30   | <0.001  | 6.21 |
| DB00213     | Pantoprazole  | 1.83                | 0.02           | 108.30  | <0.001  | 6.21 |
| DB01156     | Bupropion     | 1.82                | 0.02           | 121.25  | <0.001  | 6.19 |
| DB00571     | Propranolol   | 1.81                | 0.02           | 73.07   | <0.001  | 6.14 |
| DB00983     | Formoterol    | 1.71                | 0.03           | 52.70   | <0.001  | 5.56 |
| DB00425     | Zolpidem      | 1.71                | 0.01           | 138.75  | <0.001  | 5.55 |
| DB00736     | Esomeprazole  | 1.68                | 0.01           | 131.96  | <0.001  | 5.35 |
| DB01136     | Carvedilol    | 1.57                | 0.02           | 85.03   | <0.001  | 4.80 |
| DB00455     | Loratadine    | 1.55                | 0.02           | 100.23  | <0.001  | 4.73 |
| DB00497     | Oxycodone     | 1.52                | 0.01           | 131.63  | <0.001  | 4.59 |
| DB01241     | Gemfibrozil   | 1.52                | 0.04           | 42.77   | <0.001  | 4.56 |
| DB00471     | Montelukast   | 1.51                | 0.02           | 90.50   | <0.001  | 4.51 |
| DB01050     | Ibuprofen     | 1.49                | 0.01           | 129.36  | <0.001  | 4.45 |
| DB00682     | Warfarin      | 1.48                | 0.02           | 95.85   | <0.001  | 4.38 |
| DB00586     | Diclofenac    | 1.47                | 0.02           | 75.50   | <0.001  | 4.36 |
| DB00472     | Fluoxetine    | 1.46                | 0.01           | 110.92  | <0.001  | 4.31 |
| DB01224     | Quetiapine    | 1.45                | 0.02           | 74.88   | <0.001  | 4.25 |
| DB01036     | Tolterodine   | 1.45                | 0.03           | 42.89   | <0.001  | 4.24 |
| DB00829     | Diazepam      | 1.44                | 0.02           | 84.69   | <0.001  | 4.24 |
| DB00627     | Niacin        | 1.42                | 0.03           | 49.75   | <0.001  | 4.13 |
| DB00193     | Tramadol      | 1.40                | 0.01           | 122.78  | <0.001  | 4.07 |
| DB00482     | Celecoxib     | 1.39                | 0.02           | 60.66   | <0.001  | 4.03 |
| DB00316     | Acetaminophen | 1.39                | 0.01           | 228.40  | <0.001  | 4.01 |
| DB00788     | Naproxen      | 1.38                | 0.01           | 106.69  | <0.001  | 3.99 |
| DB00476     | Duloxetine    | 1.38                | 0.01           | 104.49  | <0.001  | 3.97 |
| DB00758     | Clopidogrel   | 1.36                | 0.02           | 90.52   | <0.001  | 3.91 |
| DB00661     | Verapamil     | 1.19                | 0.03           | 45.26   | <0.001  | 3.28 |
| DB00734     | Risperidone   | 1.18                | 0.02           | 52.08   | <0.001  | 3.24 |
| DB00641     | Simvastatin   | 1.17                | 0.01           | 118.97  | <0.001  | 3.22 |
| DB00404     | Alprazolam    | 1.15                | 0.01           | 113.94  | <0.001  | 3.15 |
| DB01016     | Glyburide     | 1.14                | 0.03           | 36.39   | <0.001  | 3.13 |
| DB01039     | Fenofibrate   | 1.13                | 0.02           | 51.57   | <0.001  | 3.08 |
| DB00343     | Diltiazem     | 1.09                | 0.02           | 52.90   | <0.001  | 2.98 |
| DB00461     | Nabumetone    | 1.03                | 0.03           | 38.83   | <0.001  | 2.81 |

**Table 3**  
Analysis result for the real data Cont'd

| Drugbank ID | Drug Name                   | Estimates of log OR | Standard Error | Z value | P value | OR   |
|-------------|-----------------------------|---------------------|----------------|---------|---------|------|
| DB01132     | Pioglitazone                | 0.96                | 0.03           | 37.00   | <0.001  | 2.62 |
| DB01076     | Atorvastatin                | 0.96                | 0.01           | 76.31   | <0.001  | 2.60 |
| DB01115     | Nifedipine                  | 0.95                | 0.03           | 28.05   | <0.001  | 2.59 |
| DB00973     | Ezetimibe                   | 0.90                | 0.02           | 42.92   | <0.001  | 2.45 |
| DB00863     | Ranitidine                  | 0.88                | 0.02           | 56.93   | <0.001  | 2.41 |
| DB00814     | Meloxicam                   | 0.84                | 0.02           | 49.92   | <0.001  | 2.31 |
| DB00603     | Medroxyprogesterone acetate | 0.84                | 0.02           | 39.93   | <0.001  | 2.31 |
| DB00957     | Norgestimate                | 0.83                | 0.03           | 30.51   | <0.001  | 2.29 |
| DB00384     | Triamterene                 | 0.81                | 0.02           | 43.21   | <0.001  | 2.26 |
| DB00678     | Losartan                    | 0.78                | 0.02           | 43.09   | <0.001  | 2.19 |
| DB00367     | Levonorgestrel              | 0.74                | 0.03           | 23.94   | <0.001  | 2.09 |
| DB00448     | Lansoprazole                | 0.70                | 0.02           | 30.64   | <0.001  | 2.02 |
| DB00227     | Lovastatin                  | 0.69                | 0.03           | 21.44   | <0.001  | 1.99 |
| DB00977     | Ethinyl Estradiol           | 0.62                | 0.02           | 39.72   | <0.001  | 1.85 |
| DB00286     | Conjugated Equine Estrogens | 0.60                | 0.02           | 31.78   | <0.001  | 1.82 |
| DB00331     | Metformin                   | 0.54                | 0.01           | 46.62   | <0.001  | 1.72 |
| DB00177     | Valsartan                   | 0.49                | 0.02           | 23.91   | <0.001  | 1.64 |
| DB00715     | Paroxetine                  | 0.48                | 0.02           | 26.46   | <0.001  | 1.62 |
| DB01175     | Escitalopram                | 0.47                | 0.01           | 33.30   | <0.001  | 1.60 |
| DB00381     | Amlodipine                  | 0.46                | 0.01           | 41.10   | <0.001  | 1.58 |
| DB00717     | Norethisterone              | 0.44                | 0.03           | 15.01   | <0.001  | 1.55 |
| DB01104     | Sertraline                  | 0.40                | 0.01           | 32.65   | <0.001  | 1.50 |
| DB00215     | Citalopram                  | 0.36                | 0.01           | 24.81   | <0.001  | 1.44 |
| DB01395     | Drospirenone                | 0.21                | 0.05           | 4.25    | <0.001  | 1.23 |
| DB01029     | Irbesartan                  | 0.15                | 0.05           | 3.03    | <0.001  | 1.16 |
| DB00999     | Hydrochlorothiazide         | 0.07                | 0.01           | 8.42    | <0.001  | 1.08 |
| DB00783     | Estradiol                   | 0.07                | 0.02           | 3.15    | <0.001  | 1.07 |
| DB00175     | Pravastatin                 | -0.01               | 0.02           | -0.32   | 0.75    | 0.99 |
| DB00481     | Raloxifene                  | -0.41               | 0.04           | -10.68  | <0.001  | 0.67 |
